# Supplementary material for: Lysophosphatidylinositol-Acyltransferase-1 (LPIAT1) Is Required to Maintain Physiological Levels of PtdIns and PtdInsP2 in the Mouse
Source: PubMed Central journal article supplement (PMC3589398; doi:10.1371/journal.pone.0058425), 2013-03-05

A

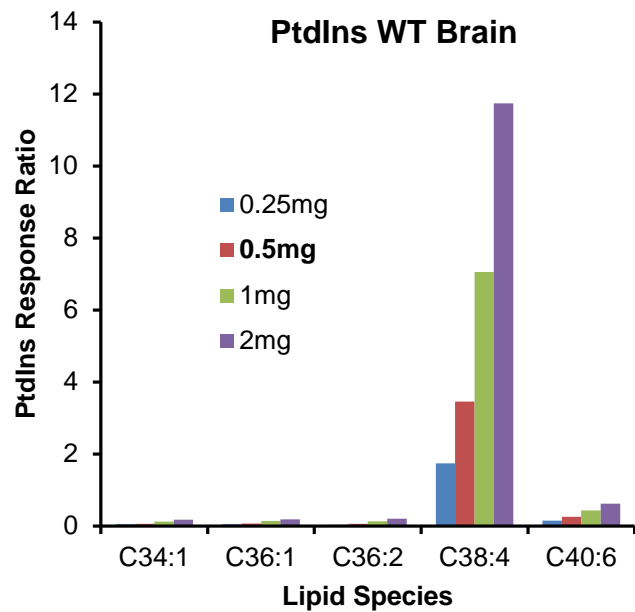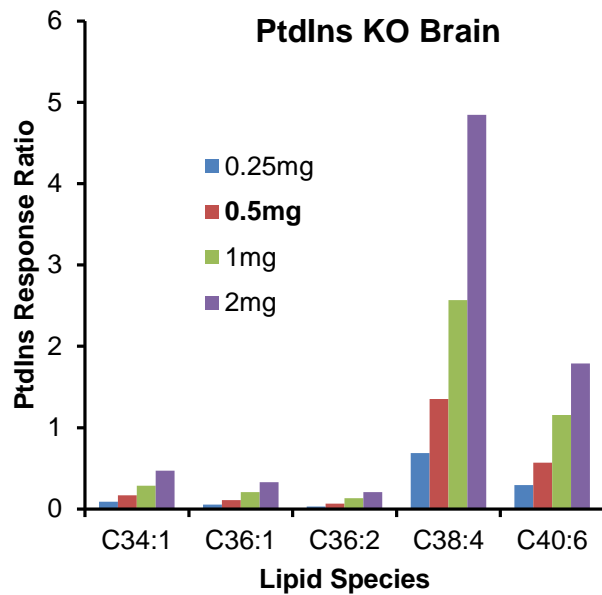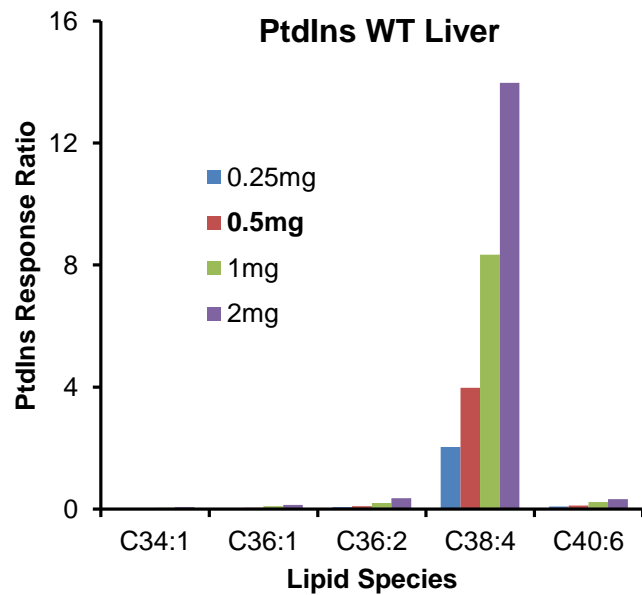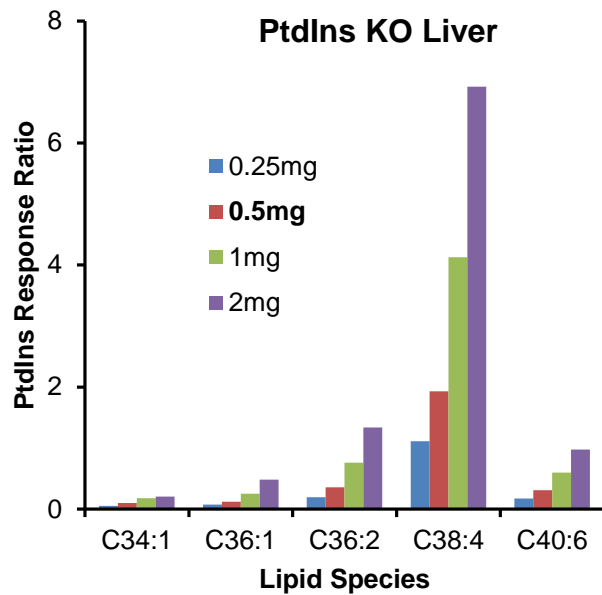

**B**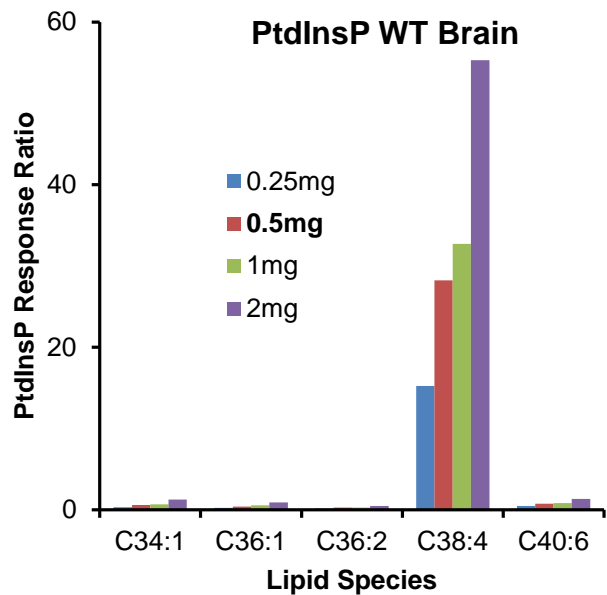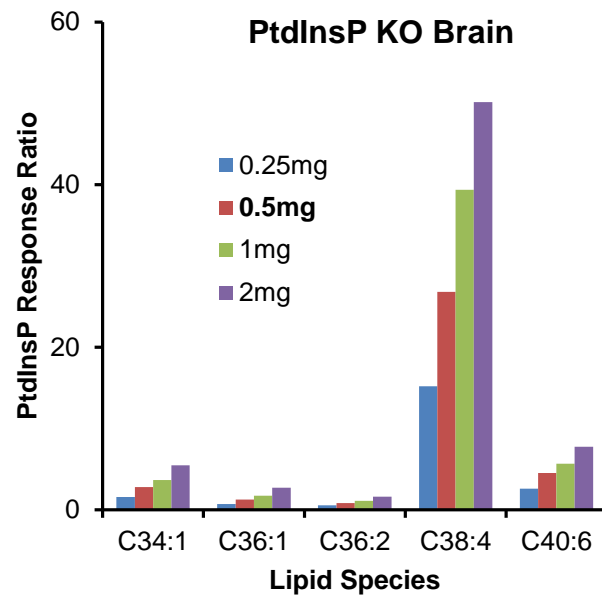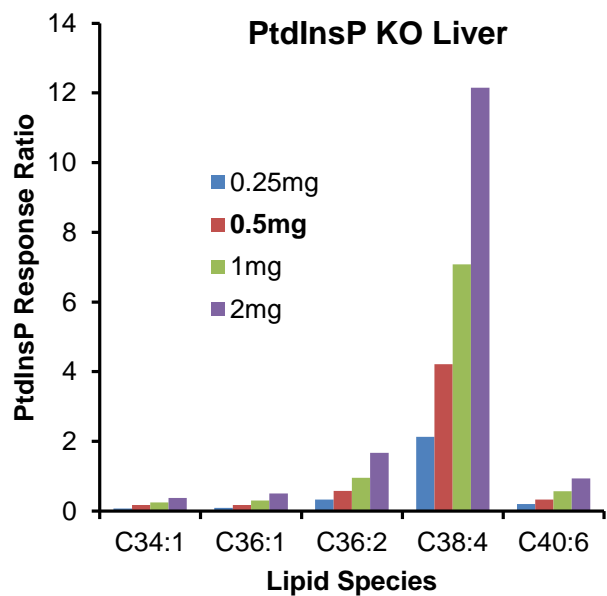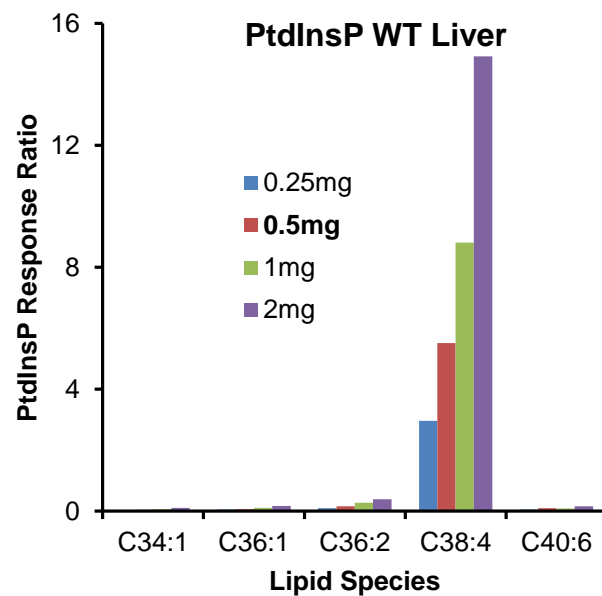

**C**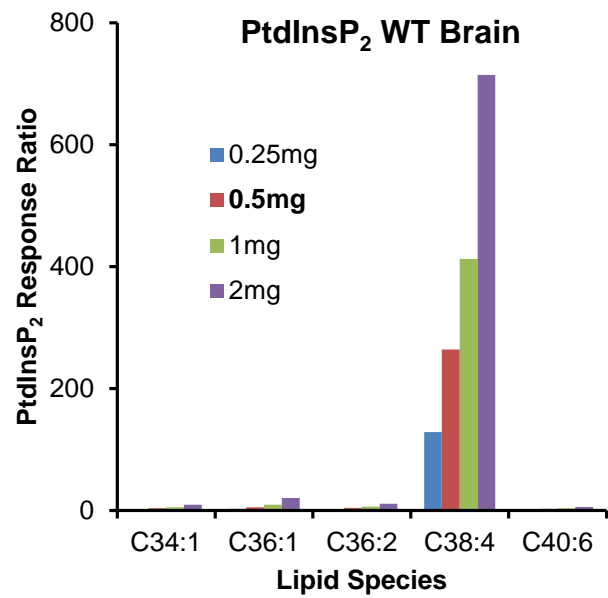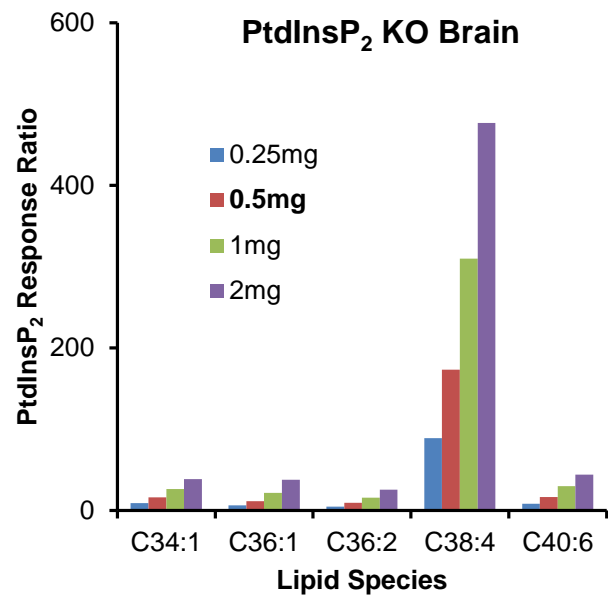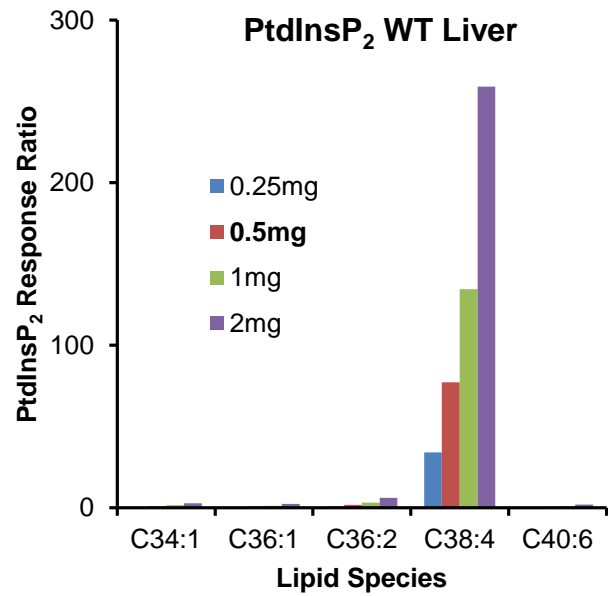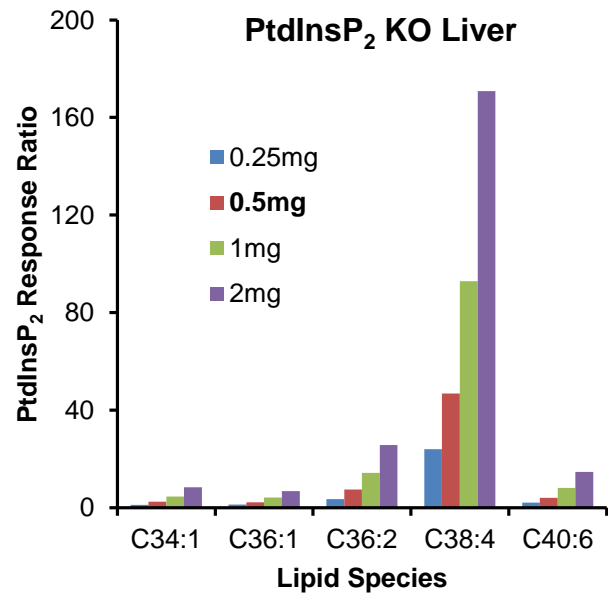

**D****C38:4 PtdInsP<sub>3</sub> WT Brain**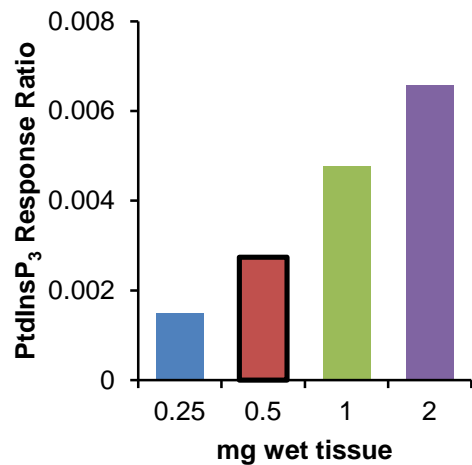**C38:4 PtdInsP<sub>3</sub> KO Brain**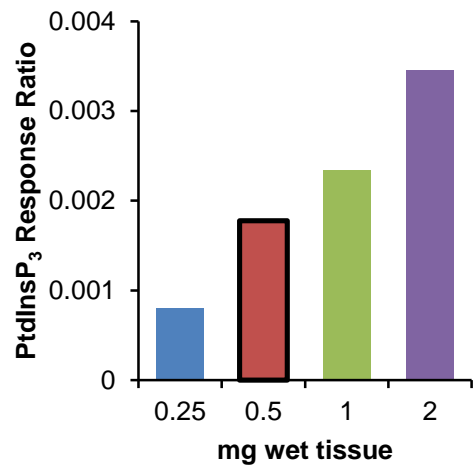**C38:4 PtdInsP<sub>3</sub> WT Liver**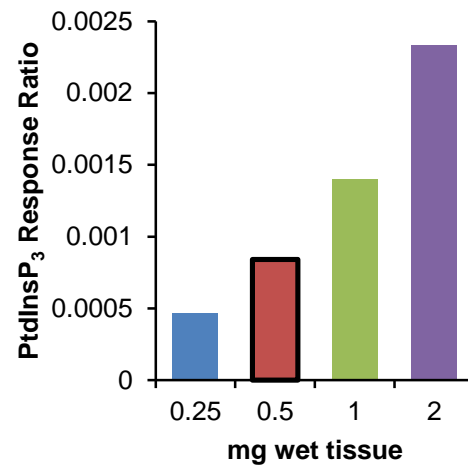**C38:4 PtdInsP<sub>3</sub> KO Liver**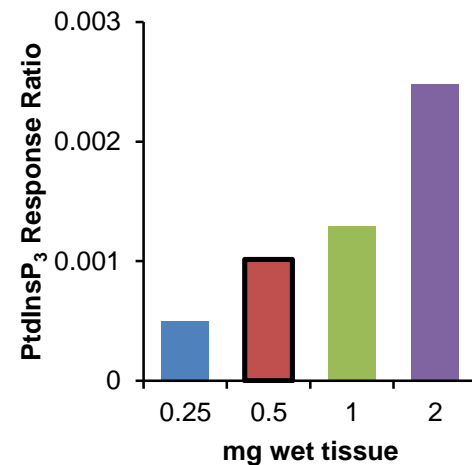**C38:4 PS WT Brain**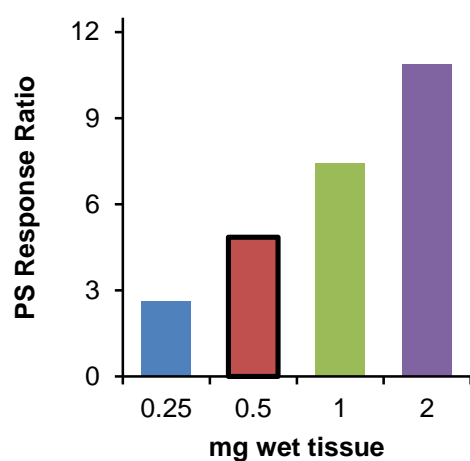**C38:4 PS KO Brain**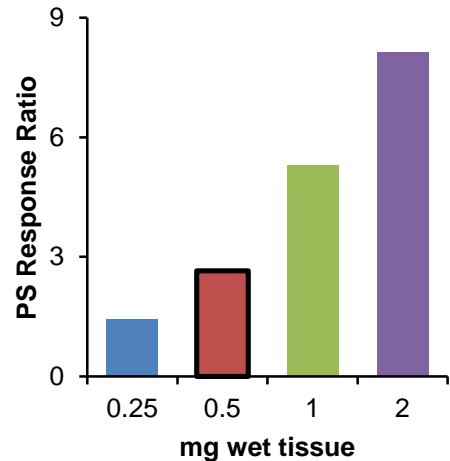**C38:4 PS WT Liver**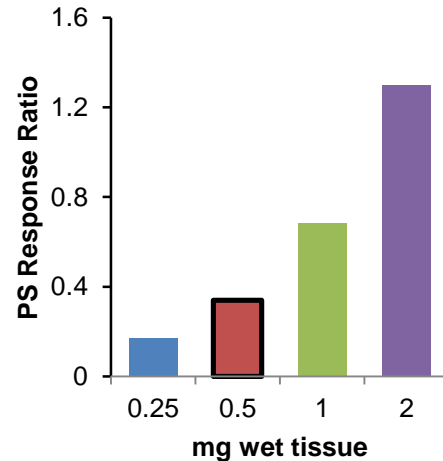**C38:4 PS KO Liver**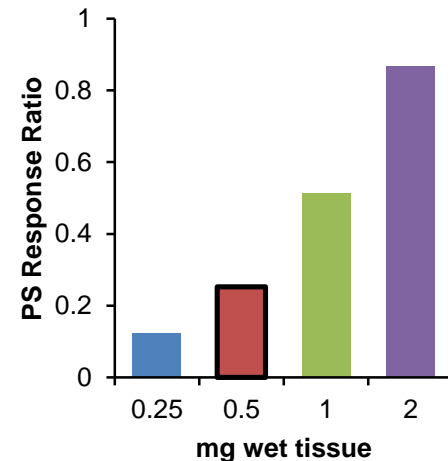

Supplement: pone.0058425.s006.pdf [file pone.0058425.s006.pdf]
