# Supplementary material for: Lysophosphatidylinositol-Acyltransferase-1 (LPIAT1) Is Required to Maintain Physiological Levels of PtdIns and PtdInsP2 in the Mouse
Source: PubMed Central journal article supplement (PMC3589398; doi:10.1371/journal.pone.0058425), 2013-03-05
Supplement: pone.0058425.s011.pdf [file pone.0058425.s011.pdf]

## Internal Standards

| Q1 Mass (Da) | Q3 Mass (Da) |                                             |
|--------------|--------------|---------------------------------------------|
| 1163.519     | 565.519      | C17:0 C16:0 PtdIns(3,4,5)P <sub>3</sub> ISD |
| 1055.569     | 565.519      | C17:0 C16:0 PtdInsP <sub>2</sub> ISD        |
| 839.559      | 565.519      | C17:0 C16:0 PtdIns ISD                      |
| 778.549      | 565.519      | C17:0 C16:0 PS ISD                          |
| 810.601      | 198.089      | C17:0 C20:4 PC ISD                          |
| 768.554      | 613.519      | C17:0 C20:4 PE ISD                          |
| 691.519      | 565.519      | C17:0 C20:4 PA ISD                          |
| 599.319      | 325.274      | C17:1-lyso PI ISD                           |
| 453.298      | 327.289      | C17:0-lyso PA ISD                           |

## Tissue Lipids

| Q1 Mass (Da) | Q3 Mass (Da) |                            |
|--------------|--------------|----------------------------|
| 1225.535     | 627.535      | C38:4 PtdInsP <sub>3</sub> |
| 1117.585     | 627.535      | C38:4 PtdInsP <sub>2</sub> |
| 1009.575     | 627.535      | C38:4 PtdInsP              |
| 901.575      | 627.535      | C38:4 PtdIns               |
| 1093.585     | 603.535      | C36:2 PtdInsP <sub>2</sub> |
| 985.575      | 603.535      | C36:2 PtdInsP              |
| 877.575      | 603.535      | C36:2 PtdIns               |
| 1095.601     | 605.551      | C36:1 PtdInsP <sub>2</sub> |
| 987.591      | 605.551      | C36:1 PtdInsP              |
| 879.591      | 605.551      | C36:1 PtdIns               |
| 1067.585     | 577.535      | C34:1 PtdInsP <sub>2</sub> |
| 959.575      | 577.535      | C34:1 PtdInsP              |
| 851.575      | 577.535      | C34:1 PtdIns               |
| 1141.585     | 651.535      | C40:6 PtdInsP <sub>2</sub> |
| 1033.575     | 651.535      | C40:6 PtdInsP              |
| 925.575      | 651.535      | C40:6 PtdIns               |
| 825.625      | 198.089      | C38:4 PC                   |
| 782.565      | 627.535      | C38:4 PE                   |
| 840.565      | 627.535      | C38:4 PS                   |
| 753.535      | 627.535      | C38:4 PA                   |
| 801.625      | 198.089      | C36:2 PC                   |
| 758.565      | 603.535      | C36:2 PE                   |
| 816.565      | 603.535      | C36:2 PS                   |
| 729.535      | 603.535      | C36:2 PA                   |
| 803.641      | 198.089      | C36:1 PC                   |
| 760.581      | 605.551      | C36:1 PE                   |
| 818.581      | 605.551      | C36:1 PS                   |
| 731.551      | 605.551      | C36:1 PA                   |
| 775.625      | 198.089      | C34:1 PC                   |
| 732.565      | 577.535      | C34:1 PE                   |
| 790.565      | 577.535      | C34:1 PS                   |
| 703.535      | 577.535      | C34:1 PA                   |
| 849.625      | 198.089      | C40:6 PC                   |
| 806.565      | 651.535      | C34:1 PE                   |
| 864.565      | 651.535      | C34:1 PS                   |
| 777.535      | 651.535      | C34:1 PA                   |

|         |         |                |
|---------|---------|----------------|
| 554.335 | 341.305 | <b>Lyso-PS</b> |
| 496.335 | 341.305 | <b>Lyso-PE</b> |
| 539.395 | 198.089 | <b>Lyso-PC</b> |
| 467.305 | 341.305 | <b>Lyso-PA</b> |
| 615.345 | 341.305 | <b>Lyso-PI</b> |

**Support Data D1.** MRM Transitions for QTRAP Mass Spectrometer analysis of internal standards and tissue lipids.
